# Supplementary material
Source: publisher site journal article supplement (https://www.dovepress.com/article/317256)
Supplement: Supplementary file 1 [file get_supplementary_file.php]

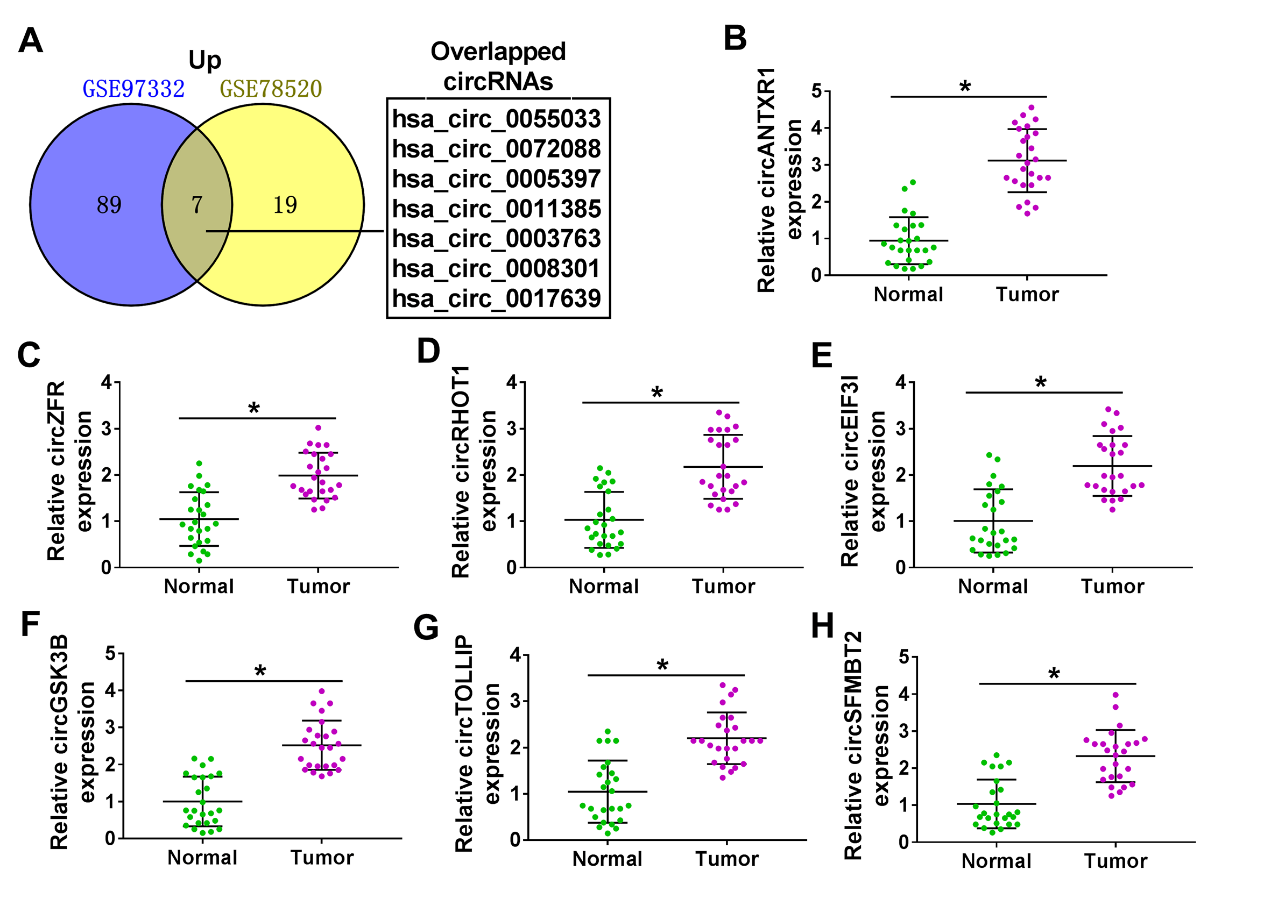


**Supplementary Fig. 1 The expression of candidate circRNA.** (A) Venn Diagram showed the upregulated circRNA in HCC tumor tissues compared to normal tissues from the GSE97332 and GSE78520 datasets. (B-H) The expression of 7 circRNAs in 25 pairs of HCC tumor tissues and paracancerous normal tissues was measured by qRT-PCR. **P* < 0.05.


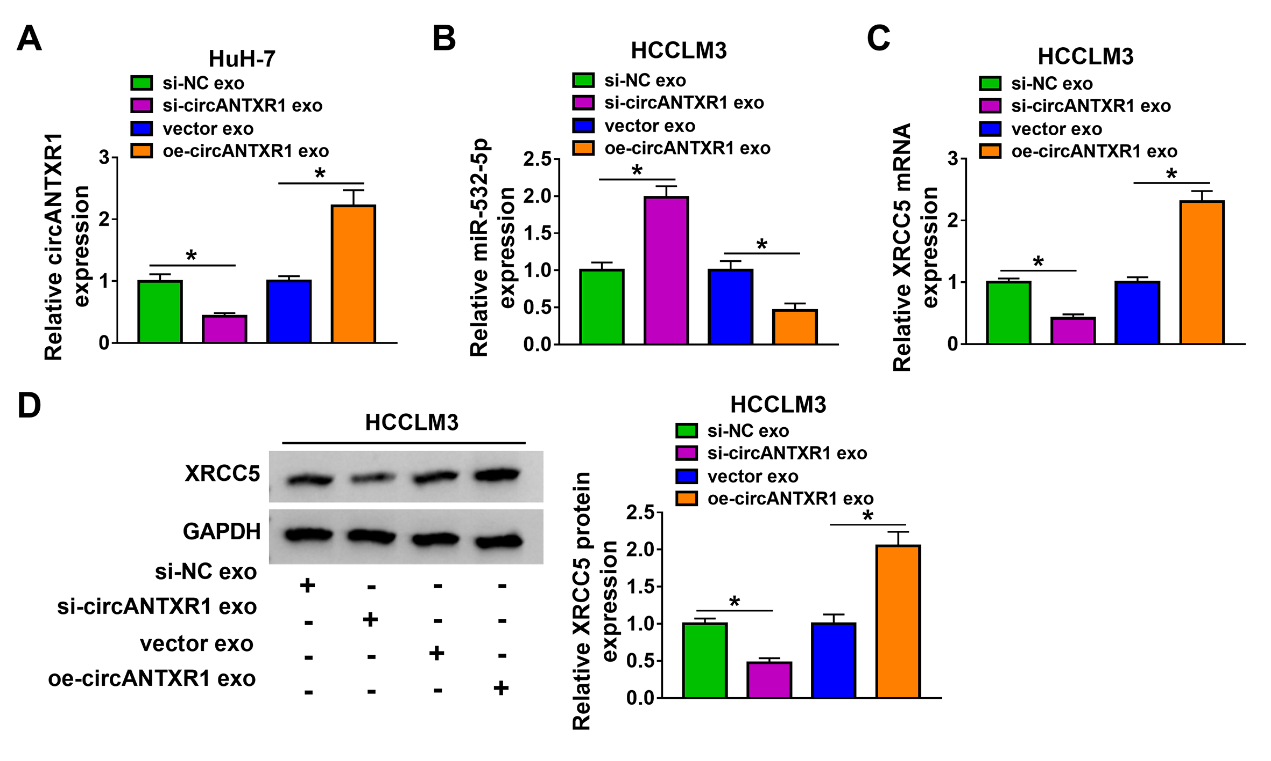


**Supplementary Fig. 2 The expression of circANTXR1, miR-532-5p and XRCC5.** (A) HuH-7 cells transfected with si-NC, si-circANTXR1#3, vector or oe-circANTXR1. After extracted exosomes from transfected HuH-7 cells, the expression of circANTXR1 in the exosomes was detected by qRT-PCR. (B-C) QRT-PCR was used to measure miR-532-5p and XRCC5 expression in HCCLM3 cells co-cultured with exosomes. (D) The protein expression of XRCC5 in HCCLM3 cells co-cultured with exosomes was determined by WB analysis. **P* < 0.05.
